# Supplementary material for: Cases of Adverse Reaction to Psychotropic Drugs and Possible Association with Pharmacogenetics
Source: J Pers Med. 2012 Oct 1;2(4):149–57. doi: 10.3390/jpm2040149 (PMC4251377; doi:10.3390/jpm2040149)
Supplement: Supplementary File 1 — PDF-Document (PDF, 182 KB) [file jpm-02-00149-s001.pdf]

|            | Age | Loss of Function<br>CYP<br>Polymorphisms<br>detected | Adverse Drug<br>Reaction on<br>Venlafaxine | Adverse drug<br>reaction<br>manifestation<br>on Venlafaxine                             | Other<br>known<br>ADRs or<br>allergies |
|------------|-----|------------------------------------------------------|--------------------------------------------|-----------------------------------------------------------------------------------------|----------------------------------------|
| Father     | 59  | CYP2C9*2;<br>CYP2D6*4/*10                            | no venlafaxine<br>taken                    |                                                                                         | egg allergy                            |
| Mother     | 56  | CYP2C9*2                                             | severe                                     | hallucinations,<br>dysphoria,<br>restlessness,<br>suicidal ideation                     |                                        |
| Daughter 1 | 36  | CYP2C9*2/*2;<br>CYP2D6*4/*10                         | no venlafaxine<br>taken                    |                                                                                         |                                        |
| Son        | 26  | CYP2D6*4/*10                                         | extremely<br>severe                        | dysphoria,<br>restlessness,<br>suicidal ideation,<br>suicide                            |                                        |
| Daughter 2 | 26  | CYP2C9*2;<br>CYP2D6*4/*10                            | no venlafaxine<br>taken                    |                                                                                         |                                        |
| Daughter 3 | 23  | CYP2C9*2                                             | no venlafaxine<br>taken                    |                                                                                         | egg allergy                            |
| Daughter 4 | 21  | CYP2D6*4/*10                                         | extremely<br>severe                        | hallucinations,<br>dysphoria,<br>restlessness,<br>suicidal ideation,<br>suicide attempt | ADR on<br>fluoxetine,<br>egg allergy   |
